# Supplementary material
Source: PubMed Central journal article supplement (PMC9351424)
Supplement: NIHMS1772284-supplement-fS2.pdf [file NIHMS1772284-supplement-fS2.pdf]

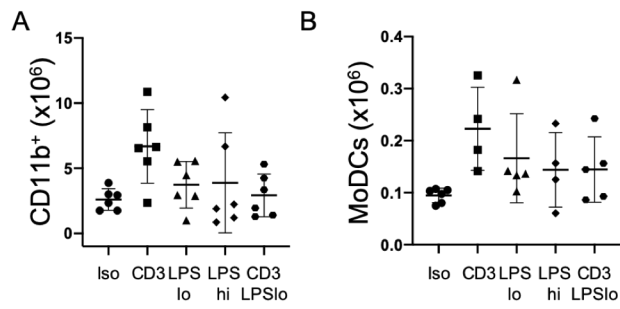

**Supplemental Figure 2. Effects of T cell Receptor Activation on the Splenic Innate Immune Response to LPS.**

Abbreviations for the five treatment groups of C57Bl/6 mice as detailed in Fig. 1. Mice studied 24 hrs. following treatment. Gating: Leukocytes: FSC/SSC, singlets, Live, CD11c<sup>-</sup>/CD11b<sup>+</sup>; Monocyte-derived Dendritic Cells (MoDCs): FSC/SSC, singlets, Live, CD11c<sup>-</sup>/CD11b<sup>+</sup>, CD11b<sup>+</sup>/Ly6G<sup>-</sup>, CD11b<sup>+</sup>/MHCII<sup>+</sup>. Full gating strategy shown in Supp. Fig. 5B. Data as mean ± standard deviation. Significance determined using one-way ANOVA with Dunnett correction for multiple comparisons; \* = p<0.05 relative to Iso # = p<0.05 LPSHi vs. CD3LPSLo. Figures representative of at least two independent experiments. A. Number of leukocytes obtained from the spleen. N=6/group. B. Number of MoDCs obtained from the spleen. N=6/group.
