# Supplementary material
Source: PubMed Central journal article supplement (PMC9351424)
Supplement: NIHMS1772284-supplement-fS4.pdf [file NIHMS1772284-supplement-fS4.pdf]

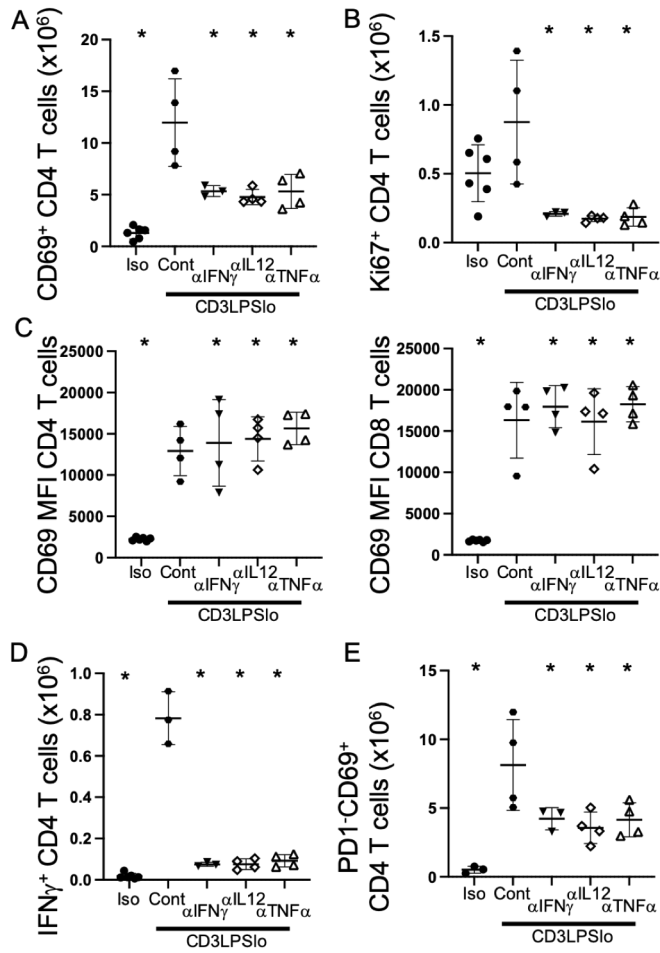

**Supplemental Figure 4. Effects of Cytokine Blockade on the T cell and Innate Immune Response to TCR modulated LPS Challenge.**

Abbreviations for the five treatment groups of C57Bl/6 mice as detailed in Fig. 1. Mice studied 24 hrs. following treatment. Gating: FSC/SSC, singlets, Live, CD90/CD4, CD90/CD8, CD69, Ki67, Granzyme B, PD1. Data as mean  $\pm$  standard deviation, full gating strategy shown in Supp. Fig. 6. Significance determined using one-way ANOVA with Dunnett correction for multiple comparisons; \* =  $p < 0.05$  relative. Figures representative of at least two independent experiments. A. Number of CD69<sup>+</sup> CD4 T cells obtained from the spleen. N=4-6/group. B. Number of Ki67<sup>+</sup> CD4 T cells obtained from the spleen. N=4-6/group. C. CD69 MFI for splenic CD69<sup>+</sup> CD4 (Left) and CD8 (Right) T cells. N=4-6/group. D. Percent CD4 T cells spontaneously producing IFN $\gamma$  *ex vivo* without stimulation. Cells treated with Brefeldin A for four hours prior to intracellular cytokine staining. N=3-4/group. E. Number of PD1<sup>+</sup>CD69<sup>+</sup> CD4 T cells obtained from the spleen. N=3/group.
