# Supplementary material
Source: PubMed Central journal article supplement (PMC9351424)
Supplement: NIHMS1772284-supplement-fS5.pdf [file NIHMS1772284-supplement-fS5.pdf]

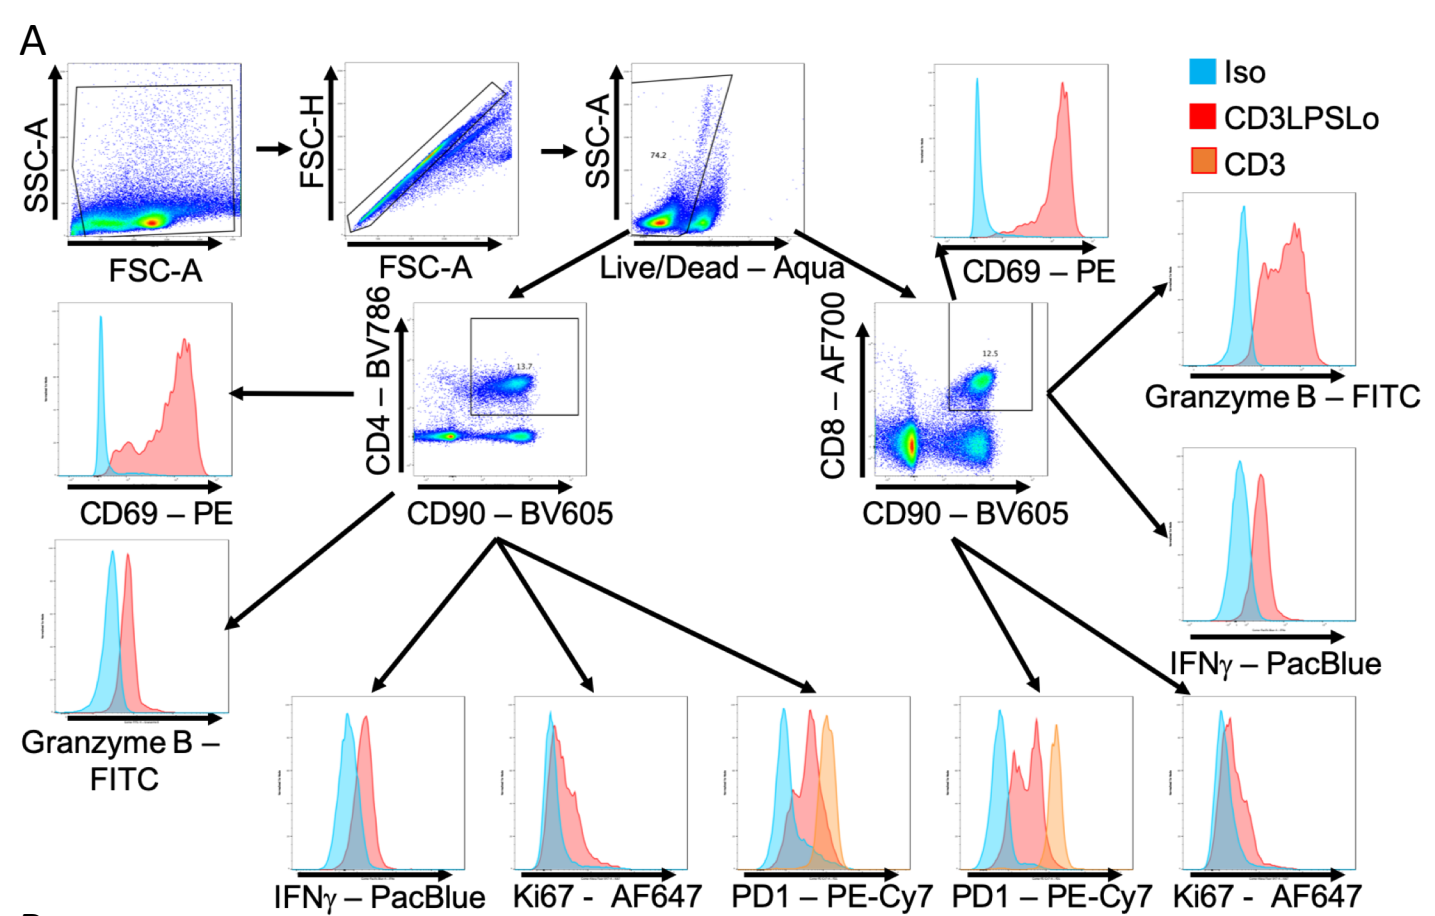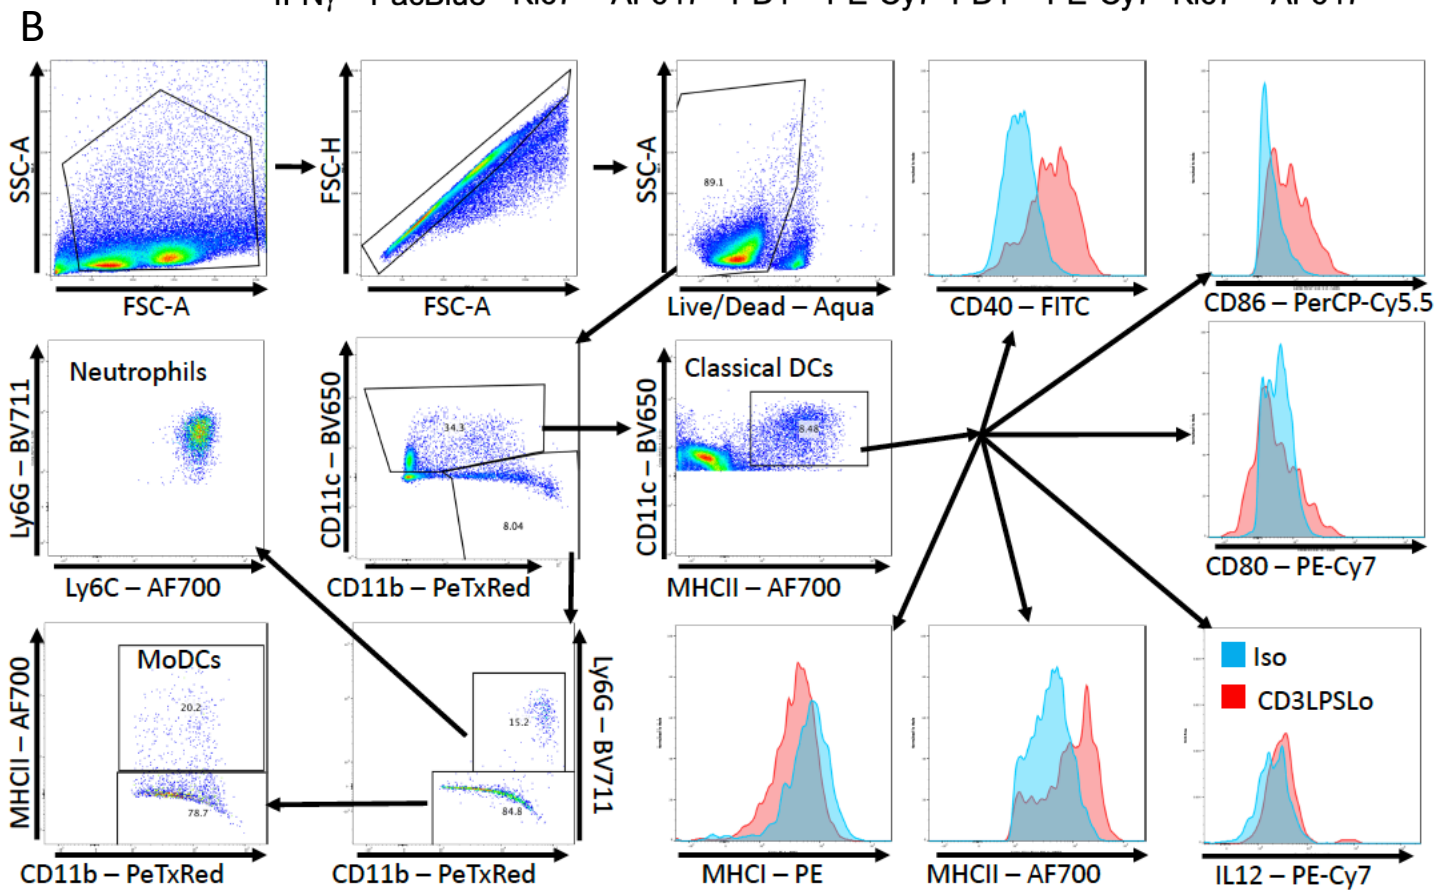

**Supplemental Figure 5. Gating Strategy for T cells and Innate Immune cells.**

A. Splenic T cell populations shown 24 hrs. following Isotype (blue), CD3LPSLo (red) or CD3 (orange) treatment.

B. Splenic innate immune populations shown 24 hrs. following Isotype (blue) or CD3LPSLo (red) treatment.
