# Supplementary material
Source: PubMed Central journal article supplement (PMC9351424)
Supplement: NIHMS1772284-supplement-tS1.pdf [file NIHMS1772284-supplement-tS1.pdf]

| Target                                                | Clone       | Cat. Number | Company       | Fluorophore  | Host Species | Target Species |
|-------------------------------------------------------|-------------|-------------|---------------|--------------|--------------|----------------|
| CD90.2 (Thy1.2)                                       | 53-2.1      | 140318      | Biologend     | BV605        | Rat          | Mouse          |
| CD8a                                                  | 53-6.7      | 100730      | Biologend     | AF700        | Rat          | Mouse          |
| CD4                                                   | RM4-5       | 100552      | Biologend     | BV785        | Rat          | Mouse          |
| CD69                                                  | H1.2F3      | 104508      | Biologend     | PE           | Hamster      | Mouse          |
| PD1 (CD279)                                           | 29F.1A12    | 135215      | Biologend     | PE/Cy7       | Rat          | Mouse          |
| Ly6C                                                  | HK1.4       | 128024      | Biologend     | AF700        | Rat          | Mouse          |
| CD11c                                                 | HL3         | 564079      | BD Bioscience | BV650        | Hamster      | Mouse          |
| Ly6G                                                  | 1A8         | 127643      | Biologend     | BV711        | Rat          | Mouse          |
| CD11b                                                 | M1/70       | 101256      | Biologend     | PE/Dazzle594 | Rat          | Mouse/Human    |
| MHCII (I-A/I-E)                                       | M5/114.15.2 | 107622      | Biologend     | AF700        | Rat          | Mouse          |
| Ki67                                                  | 16A8        | 652408      | Biologend     | AF647        | Rat          | Mouse          |
| IFN gamma                                             | XMG1.2      | 505818      | Biologend     | PacBlue      | Rat          | Mouse          |
| IL12/IL23 p40                                         | C15.6       | 505210      | Biologend     | PE/Cy7       | Rat          | Mouse          |
| Granzyme B                                            | QA16A02     | 372214      | Biologend     | PE/Cy7       | Mouse        | Human/Mouse    |
| CD40                                                  | HM40-3      | 102910      | Biologend     | AF488        | Hamster      | Mouse          |
| CD80                                                  | 16-10A1     | 104734      | Biologend     | PE/Cy7       | Hamster      | Mouse          |
| CD86                                                  | GL-1        | 105028      | Biologend     | PerCP/Cy5.5  | Rat          | Mouse          |
| Live/Dead Fixable Stain                               |             | L34957      | ThermoFisher  | Aqua         |              |                |
|                                                       |             |             |               |              |              |                |
| In Vivo                                               |             |             |               |              |              |                |
| Ultra-LEAF Purified anti-Mouse CD3e                   | 145-2C11    | 100359      | Biologend     | Activation   | Hamster      | Mouse          |
| Ultra-LEAF Purified Armenian Hamster IgG Isotype Ctrl | HTK888      | 400959      | Biologend     | Isotype      | Hamster      | Mouse          |
| Lipopolysaccharide from Escherichia coli O55:B5       |             | L2880       | Sigma-Aldrich |              |              |                |
| InvivoMab IFN gamma                                   | XMG1.2      | BE0055      | BioXCell      | Block        | Rat          | Mouse          |
| InvivoMab TNF alpha                                   | XT3.11      | BE0058      | BioXCell      | Block        | Rat          | Mouse          |
| InvivoMab IL12p40                                     | C17.8       | BE0051      | BioXCell      | Block        | Rat          | Mouse          |
